# Supplementary material for: Multicentre randomised double-blinded placebo-controlled trial of favipiravir in adults with mild COVID-19
Source: PubMed Central journal article supplement — BMJ Open. 2021 Apr 14;11(4):e047495. doi: 10.1136/bmjopen-2020-047495 (PMC8053307; doi:10.1136/bmjopen-2020-047495), 2021-04-14
Supplement: bmjopen-2020-047495supp001.pdf [file bmjopen-2020-047495supp001.pdf]

Confidential

Mild COVID-19 Trail  
Page 1 of 24

## Demographics And Epidemiological Factors

Record ID

---

### Demographics

Subject ID

---

Patient Initial

---

Date of Birth

---

Age

---

(year)

Enrolment date

---

Ethnic group

 Arab  Non Arab

Nationality

---

Gender

 Male  Female

### Epidemiological Factors

1. Close contact\* with a confirmed or probable case of COVID-19 infection, while that patient was symptomatic

 Yes  No  Unknown

2. Presence in a healthcare facility where COVID-19 infections have been managed

 Yes  No  Unknown

3. Presence in a laboratory handling suspected or confirmed COVID-19 samples

 Yes  No  Unknown

Confidential

Mild COVID-19 Trail  
Page 2 of 24

## Clinical Inclusion And Exclusion Criteria

### Inclusion Criteria

1. Male or non-pregnant female  Yes  No2. Diagnosed with Mild COVID-19 by Positive PCR confirmed SARS-coV-2 all the time of recruitment  Yes  No3. Able to sign the consent form and agree to clinical samples collection (or their legal surrogates if subjects are or become unable to make informed decisions).  Yes  No4. Patient enrolled within 5 days of disease onset  Yes  No5. Must agree not to enroll in another study of an investigational agent prior to completion of Day 28 of study.  Yes  No

### Exclusion Criteria

1. Patients with concomitant documented bacterial pneumonia  Yes  No2. Patients who are pregnant or breastfeeding  Yes  No3. Known sensitivity/allergy to Favipiravir  Yes  No4. Major comorbidities increasing the risk of study drug including: i. Hematologic malignancy, ii. Advanced (stage 4-5) chronic kidney disease or dialysis therapy, Severe liver damage (Child-Pugh score  $\geq$  C, AST > 5 times the upper limit), HIV.  Yes  No5. Gout/history of Gout or hyperuricemia (two times above the ULN)  Yes  No6. Having used Favipiravir or participated in any other interventional drug clinical study within 30 days prior to first dose of study drug.  Yes  No

Confidential

Page 3 of 24

---

7.The investigator believes that participating in the trial is not in the best interests of the patient, or the investigator considers unsuitable for enrollment (such as unpredictable risks or subject compliance issues)  Yes  No

---

8.Clinical prognostic non-survival, palliative care, or in deep coma and have no response to supportive treatment within three hours of admission  Yes  No

---

Randomization

---

Site  Site1  
 Site2  
 Site3  
 Site4  
 Site5  
 Site6  
 Site7  
 Site8  
 Site9  
 Site10

---

Patient Recruited in ?  Hospital  
 Community

---

Treatment  A  
 B  
 C  
 D

---

Randomization Time

---

Confidential

Mild COVID-19 Trail  
Page 4 of 24

## Co-Morbidities

Height

---

  
(cm)

Weight

---

  
(kg)**Co-morbidities and risk factors - Charlson Index will be calculated for each patient at analysis.**

|                                                                                | Yes                   | No                    | NA                    |
|--------------------------------------------------------------------------------|-----------------------|-----------------------|-----------------------|
| Hypertension                                                                   | <input type="radio"/> | <input type="radio"/> | <input type="radio"/> |
| Chronic cardiac disease, including congenital heart disease (not hypertension) | <input type="radio"/> | <input type="radio"/> | <input type="radio"/> |
| Chronic pulmonary disease (not asthma)                                         | <input type="radio"/> | <input type="radio"/> | <input type="radio"/> |
| Asthma (physician diagnosed)                                                   | <input type="radio"/> | <input type="radio"/> | <input type="radio"/> |
| Chronic kidney disease                                                         | <input type="radio"/> | <input type="radio"/> | <input type="radio"/> |
| Chronic liver disease                                                          | <input type="radio"/> | <input type="radio"/> | <input type="radio"/> |
| Chronic neurological disorder                                                  | <input type="radio"/> | <input type="radio"/> | <input type="radio"/> |
| Chronic Rheumatologic/Auto-immune disorder                                     | <input type="radio"/> | <input type="radio"/> | <input type="radio"/> |
| Obesity (BMI more than 30)                                                     | <input type="radio"/> | <input type="radio"/> | <input type="radio"/> |
| Diabetes with complications                                                    | <input type="radio"/> | <input type="radio"/> | <input type="radio"/> |
| Diabetes without complications                                                 | <input type="radio"/> | <input type="radio"/> | <input type="radio"/> |
| Smoking                                                                        | <input type="radio"/> | <input type="radio"/> | <input type="radio"/> |
| Other                                                                          | <input type="radio"/> | <input type="radio"/> | <input type="radio"/> |

Specify, Other Co-Morbidities

Confidential

Mild COVID-19 Trail  
Page 5 of 24

## Onset And Admission

### At Other Facility

Onset date of first/earliest symptom

---

Did the patient visit another health care facility since the onset date of first/earliest symptom?

 Yes  No  NA

Date of the visit

---

Name of Facility

---

City

---

What health care was provided?

 Inpatient (Ward, ICU)  
 Outpatient (ER, Clinic, Primary Care)  
 NA  
 Others

Was admission required?

 Yes  No  NA

Date of Admission

---

Date of Discharge

---

### At This Facility

Location of Patient at the Time of Randomization

 Outpatient  ER  Ward

Was Admission Required?

 Yes  No  NA

Admission Date at this Facility

---

Confidential

Mild COVID-19 Trail  
Page 6 of 24

## Vital Signs At Randomization

**(First Available Data at Presentation/Admission-within 24 Hours)**

Temperature

---

  
(°C)

Heart Rate

---

  
(Beats Per Minute)

Respiratory Rate

---

  
(Breaths Per Minute )

Systolic BP

---

  
(mmHg )

Diastolic BP

---

  
(mmHg )

Oxygen Saturation:

---

  
(% )

Oxygen saturation On:

 Room air    Oxygen therapy  
 NA

Specify Therapy

- 
- Nasal Cannula
- 
- 
- Facemask
- 
- 
- Non- rebreathable mask
- 
- 
- High flow nasal cannula
- 
- 
- Non-invasive ventilation (BiPap, CPap)
- 
- 
- Invasive Mechanical Ventilation

Please, mention amount

- 
- 
- 
- L/min
- 
- 
- %

Confidential

Mild COVID-19 Trail  
Page 7 of 24

## Symptoms

| Observed/reported at admission and associated with this episode of acute illness |                       |                       |                       |
|----------------------------------------------------------------------------------|-----------------------|-----------------------|-----------------------|
|                                                                                  | Yes                   | No                    | NA                    |
| Fever                                                                            | <input type="radio"/> | <input type="radio"/> | <input type="radio"/> |
| Cough                                                                            | <input type="radio"/> | <input type="radio"/> | <input type="radio"/> |
| Cough with Sputum Production                                                     | <input type="radio"/> | <input type="radio"/> | <input type="radio"/> |
| Cough with Bloody Sputum/Haemoptysis                                             | <input type="radio"/> | <input type="radio"/> | <input type="radio"/> |
| Sore Throat                                                                      | <input type="radio"/> | <input type="radio"/> | <input type="radio"/> |
| Runny Nose (Rhinorrhoea)                                                         | <input type="radio"/> | <input type="radio"/> | <input type="radio"/> |
| Chest Pain                                                                       | <input type="radio"/> | <input type="radio"/> | <input type="radio"/> |
| Shortness of Breath (Dyspnea)                                                    | <input type="radio"/> | <input type="radio"/> | <input type="radio"/> |
| Loss of smell                                                                    | <input type="radio"/> | <input type="radio"/> | <input type="radio"/> |
| Loss of taste                                                                    | <input type="radio"/> | <input type="radio"/> | <input type="radio"/> |
| Abdominal Pain                                                                   | <input type="radio"/> | <input type="radio"/> | <input type="radio"/> |
| Vomiting / Nausea                                                                | <input type="radio"/> | <input type="radio"/> | <input type="radio"/> |
| Diarrhoea                                                                        | <input type="radio"/> | <input type="radio"/> | <input type="radio"/> |
| Ear Pain                                                                         | <input type="radio"/> | <input type="radio"/> | <input type="radio"/> |
| Muscle Aches (Myalgia)                                                           | <input type="radio"/> | <input type="radio"/> | <input type="radio"/> |
| Joint Pain (Arthralgia)                                                          | <input type="radio"/> | <input type="radio"/> | <input type="radio"/> |
| Fatigue / Malaise                                                                | <input type="radio"/> | <input type="radio"/> | <input type="radio"/> |
| Lower Chest Wall Indrawing                                                       | <input type="radio"/> | <input type="radio"/> | <input type="radio"/> |
| Headache                                                                         | <input type="radio"/> | <input type="radio"/> | <input type="radio"/> |
| Conjunctivitis                                                                   | <input type="radio"/> | <input type="radio"/> | <input type="radio"/> |
| Skin Rash                                                                        | <input type="radio"/> | <input type="radio"/> | <input type="radio"/> |
| Skin Ulcers                                                                      | <input type="radio"/> | <input type="radio"/> | <input type="radio"/> |
| Lymphadenopathy                                                                  | <input type="radio"/> | <input type="radio"/> | <input type="radio"/> |

Confidential

Mild COVID-19 Trial  
Page 8 of 24

## Daily Clinical Assessment

**Complete one form on admission, one form on admission to ICU, and daily up to 28 days or until discharge or death if earlier. Record the worst value between 00:00 to 24:00 on day of assessment (if Not Available write 'N/A')**

Study Day (clinical assesment study day start on 2nd day after randomization)

\_\_\_\_\_ (Day)

Date of Phone Assesment

\_\_\_\_\_

Time

\_\_\_\_\_

Current admission to ICU?

- Yes  
 No

FiO2 (0.21-1.0)

\_\_\_\_\_

SaO2

\_\_\_\_\_ (%)

PaO2 at time of FiO2 above

\_\_\_\_\_

- kPa  
 mmHg

PaO2 sample type:

- Arterial  
 Venous  
 Capillary  
 N/A

From same blood gas record as PaO2

\_\_\_\_\_

- kPa  
 mmHg

pH

\_\_\_\_\_

HCO3

\_\_\_\_\_ (mEq/L)



Confidential

Page 9 of 24

Systolic Blood Pressure

---

  
(mmHg)

Diastolic Blood Pressure

---

  
(mmHg )

Mean Arterial Blood Pressure

---

  
(mmHg )

Urine flow rate

---

  
(mL/24 hours Check if estimated )

Glasgow Coma Score (GCS / 15)

---

**Is the patient currently receiving, or has received (between 00:00 to 24:00 on day of assessment) (apply to all questions in this section):**

|                                             | Yes                   | No                    | N/A                   |
|---------------------------------------------|-----------------------|-----------------------|-----------------------|
| Non-invasive ventilation (e.g. BIPAP, CPAP) | <input type="radio"/> | <input type="radio"/> | <input type="radio"/> |
| Invasive ventilation                        | <input type="radio"/> | <input type="radio"/> | <input type="radio"/> |
| Extra corporeal life support (ECLS)         | <input type="radio"/> | <input type="radio"/> | <input type="radio"/> |
| High-flow nasal cannula oxygen therapy      | <input type="radio"/> | <input type="radio"/> | <input type="radio"/> |
| Dialysis/Hemofiltration                     | <input type="radio"/> | <input type="radio"/> | <input type="radio"/> |
| Any vasopressor/inotropic support           | <input type="radio"/> | <input type="radio"/> | <input type="radio"/> |

Progress of Symptoms at 1st Presentation (pyrexia, short of breath, and relief of cough and/or others)  
Can stop recording if resolved for 72 hours

- Worsening  
 Same  
 Better  
 Resolved

**Signs and Symptoms**

New signs and symptoms

 Yes  No

Specify,

---

  
(L/min)

Starting Date

---

Fever

 Yes,  No

Confidential

Page 10 of 24

Fever Result

---

  
(°C)

Any hospital/ER visits

 Yes  No

Was Vital Signs Collected?

 Yes  No

Temperature

---

  
(°C)

Heart Rate

---

  
( Beat Per Minut)

Respiratory Rate

---

  
(Breath Per Minute)

Systolic Blood Pressure

---

  
(mmHg)

Diastolic Blood Pressure

---

  
(mmHg)

Oxygen Saturation

---

  
(%)

Oxygen On

 Room air  Oxygen therapy  
 NA

Specify, Oxygen Therapy

---

Confidential

Mild COVID-19 Trail  
Page 11 of 24

## SARS-2-COV Testing

Sample study day

- Day 1(-5 day)  
 Day 5 (+/- 1 day)  
 Day 10 (+/-1 day)  
 Day 15 (+/- 2 day)

Collection Date

Biospecimen Type

- Nasopharyngeal swab  
 Oropharyngeal swab  
 Combined Nasopharyngeal and Oropharyngeal swab  
 Sputum  
 BAL

Laboratory labResult

- Positive    Negative  
 NA

Confidential

Mild COVID-19 Trail  
Page 12 of 24

# Lab Assessment Form

**Complete one form on admission, one form on admission to ICU, and daily up to 28 days or until discharge or death if earlier. Record the worst value between 00:00 to 24:00 on day of assessment (if Not Available write 'N/A')**

Study Day

- Day 1 (+1 day)  
 Day 5 ( $\pm 1$  day)  
 Day 10 ( $\pm 1$  day)  
 Day 15 ( $\pm 2$  day)

## Laboratory Assessment

Haemoglobin

\_\_\_\_\_

- g/L    g/dL

WBC Count

\_\_\_\_\_

- x10<sup>9</sup>/L    x10<sup>3</sup>/ $\mu$ L

Lymphocyte count

\_\_\_\_\_

(cells/  $\mu$ L)

Neutrophil count

\_\_\_\_\_

(cells/  $\mu$ L)

Platelets

\_\_\_\_\_

- x10<sup>9</sup>/L    x10<sup>3</sup>/ $\mu$ L

ALT/SGPT

\_\_\_\_\_

(U/L)

Total Bilirubin

\_\_\_\_\_

- $\mu$ mol/L    mg/dL

AST/SGOT

\_\_\_\_\_

(U/L)

Glucose

\_\_\_\_\_

01/27/2021 8:45am

projectredcap.org

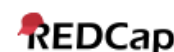

Confidential

Page 13 of 24

---

mmol/L    mg/dL

---

Blood Urea Nitrogen (urea)

\_\_\_\_\_

---

mmol/L    mg/dL

---

mmol/L    mg/dL

---

Creatinine

\_\_\_\_\_

---

umol/L    mg/dL

---

Sodium

\_\_\_\_\_ (mEq/L)

---

Potassium

\_\_\_\_\_ (mEq/L)

---

Chest X-Ray performed?       Yes    No    NA

---

Were Infiltrates Present?       Yes-Unilateral    Yes - Bilateral  
 No    NA

---

•

---

ECG performed?       Yes  
 No  
 N/A

---

if YES QT Interval

\_\_\_\_\_

Confidential

Mild COVID-19 Trail  
Page 14 of 24

## Daily Study Drug

### Favipiravir / Placebo

Was Favipiravir given?  Yes  
 No

Dose

\_\_\_\_\_

Dose Number

\_\_\_\_\_

Date

\_\_\_\_\_

Time given

\_\_\_\_\_

Drug Method

Syrup  tablet

Confidential

Mild COVID-19 Trail  
Page 15 of 24

## Pathogen Testing

---

Was Other pathogen testing done during this illness episode?

Yes  No  NA

---

Bacteria

Yes - confirmed  No

---

What Bacteria?

\_\_\_\_\_

---

Other Infectious Respiratory Diagnosis

Yes- Confirmed  Yes- Probable  
 No

---

Specify, Other Infectious Respiratory Diagnosis

\_\_\_\_\_

---

If None of the Above , Suspected Non-Infective

Yes  No

Confidential

Mild COVID-19 Trail  
Page 16 of 24**Complication ( At day 28)****At any time during hospitalization did the patient experience:**

|                                           | Yes                   | No                    |
|-------------------------------------------|-----------------------|-----------------------|
| Pulmonary Embolism                        | <input type="radio"/> | <input type="radio"/> |
| Bacterial Pneumonia                       | <input type="radio"/> | <input type="radio"/> |
| Coagulopathy                              | <input type="radio"/> | <input type="radio"/> |
| Acute lung Injury/ARDS                    | <input type="radio"/> | <input type="radio"/> |
| Anemia                                    | <input type="radio"/> | <input type="radio"/> |
| Pneumothorax                              | <input type="radio"/> | <input type="radio"/> |
| Pleural Effusion                          | <input type="radio"/> | <input type="radio"/> |
| Acute renal Injury/Failure                | <input type="radio"/> | <input type="radio"/> |
| Seizure                                   | <input type="radio"/> | <input type="radio"/> |
| Congestive Heart Failure                  | <input type="radio"/> | <input type="radio"/> |
| Meningitis/ Encephalitis                  | <input type="radio"/> | <input type="radio"/> |
| Stroke/Cerebrovascular Accident           | <input type="radio"/> | <input type="radio"/> |
| Endocarditis / Myocarditis / Pericarditis | <input type="radio"/> | <input type="radio"/> |
| Cardiac Arrhythmia                        | <input type="radio"/> | <input type="radio"/> |
| Bacteremia                                | <input type="radio"/> | <input type="radio"/> |
| Cardiac Arrest                            | <input type="radio"/> | <input type="radio"/> |
| Liver Dysfunction                         | <input type="radio"/> | <input type="radio"/> |
| Rhabdomyolysis / Myositis                 | <input type="radio"/> | <input type="radio"/> |
| Other                                     | <input type="radio"/> | <input type="radio"/> |

Specify other Complication



Confidential

Mild COVID-19 Trial  
Page 17 of 24

## Treatment

**At any time during enrollment did the patient receive/undergo?**Hospital admission?  YES  NO  N/A

date of hospital admission \_\_\_\_\_

date of hospital discharge \_\_\_\_\_

ICU or High Dependency Unit Admission?  Yes  No  NA

Date of ICU Admission \_\_\_\_\_

Date of ICU Discharge \_\_\_\_\_

Oxygen Therapy?  Yes  No  NA

Specify therapy \_\_\_\_\_

Non-invasive Ventilation? (e.g. BIPAP, CPAP)  Yes  No  NAInvasive Ventilation (Any)?  Yes  No  NA

Total Duration \_\_\_\_\_

(Days)

Tracheostomy Inserted  Yes  No  NAECMO?  Yes  No  NARenal Replacement Therapy (RRT) or Dialysis?  Yes  No  NAInotropes/Vasopressors?  Yes  No  NA

First/Start Date \_\_\_\_\_

Confidential

Page 18 of 24

---

Last/End Date

---

---

OTHER Intervention or Procedure

---

Confidential

Mild COVID-19 Trail  
Page 19 of 24

## Medication

Antiviral Agent?

 Yes  No  NASpecify, Antiviral Agent 

- Favipiravir
- Hydroxychloroquine
- chloroquine
- Lopinavir/Ritonavir
- Azithromycin
- Interferon
- Oseltamivir

Favipiravir Dose

---

Favipiravir\_start date

---

Favipiravir\_end date

---

Hydroxychloroquine Dose

---

Hydroxychloroquine\_Start date

---

Hydroxychloroquine\_End date

---

Chloroquine Dose

---

Chloroquine\_start date

---

Chloroquine\_End date

---

Lopinavir/Ritonavir Dose

---

Lopinavir/Ritonavir\_Start Date

---

Lopinavir/Ritonavir\_End Date

---

Azithromycin Dose

---

Azithromycin\_Start date

---

01/27/2021 8:45am

projectredcap.org

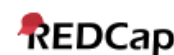

Confidential

Page 20 of 24

---

Azithromycin\_end date

---

---

Interferon Dose

---

---

Interferon\_Start date

---

---

Interferon\_End date

---

---

Oseltamivir Dose

---

---

Oseltamivir\_Start date

---

---

Oseltamivir\_End date

---

---

Anti-Interleukin-6 Agents?

Yes  No

---

Please ,Provide Type

---

---

Please ,Provide the Dose

---

---

Antibiotic?

Yes  No  NA

---

Dose

---

---

Type

---

---

Is the patient take another antibiotic?

Yes  No  NA

---

Antibiotic\_2 Type

---

---

Antibiotic\_2 Dose

---

---

Antibiotic\_3 Type

---

---

Antibiotic\_3 Dose

---

Confidential

Page 21 of 24

---

Antibiotic\_4 Type

---

---

Antibiotic\_4 Dose

---

---

Convalescent plasma?

Yes  No  N/A

---

Specify

---

---

Corticosteriod?

Yes  
 No

---

Dose

---

---

Type

---

---

Duration

---

Confidential

Mild COVID-19 Trail  
Page 22 of 24

## Outcome

### Outcome at Day 14

Outcome at day 14:

- Alive
- Hospitalization
- Transfer to other facility
- Death
- Unknown

Outcome Date \_\_\_\_\_

Hospital Discharge Date \_\_\_\_\_

### Outcome at Day 28

Outcome at Day 28

- Alive
- Death

Outcome Date \_\_\_\_\_

Confidential

Mild COVID-19 Trail  
Page 23 of 24

## Adverse Drug Reaction

### Allergic Reaction

Day \_\_\_\_\_

Skin Rash/Urticaria  No  1  2  3Bronchospasm  No  1  2  3Dyspnea  No  1  2  3Tongue Edema  No  1  2  3Local Skin Necrosis at the Injection Site  No  1  2  3OtherI  No  1  2  3

Specify, \_\_\_\_\_

OtherII  No  1  2  3

Specify, \_\_\_\_\_

### Gastrointestinal

Diarrhea  No  1  2  3  
 4  5Dysgeusia  No  1  2  3  
 4  5Nausea  No  1  2  3  
 4  5Vomiting  No  1  2  3  
 4  5Abdominal Pain  No  1  2  3  
 4  5

Confidential

Page 24 of 24

OtherI  No  1  2  3  
 4  5

Specify,

OtherII  No  1  2  3  
 4  5

Specify,

### Central Nervous System

Headache  No  1  2  3

Insomnia  No  1  2  3

Psychosis  No  1  2  3  
 4  5

Depression  No  1  2  3  
 4  5

Mania  No  1  2  3  
 4  5

ECG: QT Interval Changes  No  1  2  3  
 4  5

OtherI  No  1  2  3  
 4  5

Specify,

OtherII  No  1  2  3  
 4  5

Specify,
